# Supplementary material for: Validation of Two Commercial Multiplex Real-Time PCR Assays for Detection of SARS-CoV-2 in Stool Donors for Fecal Microbiota Transplantation
Source: MDPI journal article supplement (doi:10.3390/microorganisms10020284), 2022-01-26
Supplement: s1 [file s1]

**Table S1.** Correlation of C<sub>T</sub> values and concentration of stool used in preliminary experiments performed with the Seegene Allplex™ SARS-CoV-2/FluA/FluB/RSV (SC2FABR) assay, spiking samples with serial 10-fold dilutions of SARS-CoV-2 viral inactivated lysates. Quantitative evaluations of SARS-CoV-2 viral load (TCID<sub>50</sub>/mL) have been also reported. Abbreviations: TCID, median tissue culture infectious dose; ExoIC, exogenous rRT-PCR control; EndoIC, endogenous rRT-PCR control; nd: not detected.

|                  |                                         | Allplex™SARS-CoV-2/FluA/FluB/RSV Assay |   |                |      |                |   |                |        |                |       |                |
|------------------|-----------------------------------------|----------------------------------------|---|----------------|------|----------------|---|----------------|--------|----------------|-------|----------------|
| Dilution         | Viral titre<br>(TCID <sub>50</sub> /mL) | Stool<br>conc.<br>(mg/mL)              | S | C <sub>T</sub> | RdRP | C <sub>T</sub> | N | C <sub>T</sub> | EndoIC | C <sub>T</sub> | ExoIC | C <sub>T</sub> |
| 10 <sup>-1</sup> | 2x10 <sup>5</sup>                       | 50                                     | + | 21.90          | +    | 21.88          | + | 27.12          | +      | 28.28          | +     | 30.64          |
| 10 <sup>-2</sup> | 2x10 <sup>4</sup>                       |                                        | + | 27.14          | +    | 28.42          | + | 35.13          | +      | 31.92          | +     | 34.19          |
| 10 <sup>-3</sup> | 2x10 <sup>3</sup>                       |                                        | + | 29.66          | +    | 30.11          | + | 36.18          | +      | 36.24          | +     | 32.06          |
| 10 <sup>-4</sup> | 2x10 <sup>2</sup>                       |                                        | + | 34.50          | +    | 37.37          | - | N/A            | +      | 38.74          | +     | 34.41          |
| 10 <sup>-5</sup> | 2x10 <sup>1</sup>                       |                                        | - | N/A            | -    | N/A            | - | N/A            | +      | 38.38          | +     | 34.99          |
| 10 <sup>-6</sup> | 2                                       |                                        | - | N/A            | -    | N/A            | - | N/A            | +      | 33.36          | +     | 36.46          |
| 10 <sup>-1</sup> | 2x10 <sup>5</sup>                       | 20                                     | + | 19.05          | +    | 19.53          | + | 22.06          | +      | 30.25          | +     | 28.91          |
| 10 <sup>-2</sup> | 2x10 <sup>4</sup>                       |                                        | + | 22.08          | +    | 22.71          | + | 25.94          | +      | 33.77          | +     | 28.79          |
| 10 <sup>-3</sup> | 2x10 <sup>3</sup>                       |                                        | + | 25.91          | +    | 28.01          | + | 32.47          | +      | 36.79          | +     | 30.29          |
| 10 <sup>-4</sup> | 2x10 <sup>2</sup>                       |                                        | + | 29.03          | +    | 29.66          | + | 33.10          | +      | 37.31          | +     | 29.07          |
| 10 <sup>-5</sup> | 2x10 <sup>1</sup>                       |                                        | + | 33.14          | +    | 34.14          | + | 35.03          | -      | nd             | +     | 30.61          |
| 10 <sup>-6</sup> | 2                                       |                                        | - | N/A            | -    | N/A            | - | N/A            | +      | 37.40          | +     | 31.07          |

**Table S2.** Overview of C<sub>T</sub> values of control samples from rRT-PCR experiments performed with the Seegene Allplex™ SARS-CoV-2 (SC2) and SARS-CoV-2/FluA/FluB/RSV (SC2FABR) assays, using serial 10-fold spiked dilutions of SARS-CoV-2 viral inactivated lysates in stool samples and controls (ASL). Quantitative evaluations of SARS-CoV-2 viral load have been also reported. Abbreviations: cp, copies; CV, coefficient of variation; SD, standard deviation; TCID, median tissue culture infectious dose; ExoIC, exogenous rRT-PCR control; EndoIC, endogenous rRT-PCR control.

| Dilution         | Viral titre<br>(TCID <sub>50</sub> /mL) | RNA cp/μL            | RNA<br>cp/mg         | Allplex™ SARS-CoV-2                     |                                |           |                                       | Allplex™ SARS-CoV-2/FluA/FluB/RSV Assays |                                |           |                                       |                                         |                                |           |                                       |
|------------------|-----------------------------------------|----------------------|----------------------|-----------------------------------------|--------------------------------|-----------|---------------------------------------|------------------------------------------|--------------------------------|-----------|---------------------------------------|-----------------------------------------|--------------------------------|-----------|---------------------------------------|
|                  |                                         |                      |                      | C <sub>T</sub> <sup>ExoIC</sup><br>(SD) | Percent<br>positivity<br>(n/N) | CV<br>(%) | C <sub>T</sub> <sup>ASL</sup><br>(SD) | C <sub>T</sub> <sup>EndoIC</sup><br>(SD) | Percent<br>positivity<br>(n/N) | CV<br>(%) | C <sub>T</sub> <sup>ASL</sup><br>(SD) | C <sub>T</sub> <sup>ExoIC</sup><br>(SD) | Percent<br>positivity<br>(n/N) | CV<br>(%) | C <sub>T</sub> <sup>ASL</sup><br>(SD) |
| 10 <sup>-1</sup> | 2x10 <sup>5</sup>                       | 1.03x10 <sup>7</sup> | 5.15E+08             | 23.53<br>(1.45)                         | 100<br>(30/30)                 | 6.16      | 23.34<br>(1.96)                       | 27.21<br>(0.98)                          | 100<br>(30/30)                 | 3.60      | 27.59<br>(0.70)                       | 23.28<br>(0.82)                         | 100<br>(30/30)                 | 3.52      | 22.13<br>(0.95)                       |
| 10 <sup>-2</sup> | 2x10 <sup>4</sup>                       | 1.06x10 <sup>6</sup> | 5.30x10 <sup>7</sup> | 23.47<br>(1.58)                         | 100<br>(30/30)                 | 6.73      | 23.23<br>(2.01)                       | 30.04<br>(0.99)                          | 100<br>(30/30)                 | 3.30      | 30.54<br>(0.64)                       | 23.30<br>(0.97)                         | 100<br>(30/30)                 | 4.16      | 23.20<br>(0.76)                       |
| 10 <sup>-3</sup> | 2x10 <sup>3</sup>                       | 9.71x10 <sup>4</sup> | 4.86x10 <sup>6</sup> | 23.68<br>(1.51)                         | 100<br>(30/30)                 | 6.38      | 23.89<br>(2.00)                       | 32.98<br>(1.13)                          | 100<br>(30/30)                 | 3.43      | 32.96<br>(1.25)                       | 23.42<br>(1.02)                         | 100<br>(30/30)                 | 4.36      | 23.75<br>(1.31)                       |
| 10 <sup>-4</sup> | 2x10 <sup>2</sup>                       | 9.97x10 <sup>3</sup> | 4.99x10 <sup>5</sup> | 23.84<br>(1.31)                         | 100<br>(30/30)                 | 5.49      | 24.17<br>(1.76)                       | 34.57<br>(1.43)                          | 100<br>(30/30)                 | 4.14      | 34.23<br>(1.97)                       | 23.21<br>(0.91)                         | 100<br>(30/30)                 | 3.92      | 23.87<br>(1.32)                       |
| 10 <sup>-5</sup> | 2x10 <sup>1</sup>                       | 9.27x10 <sup>2</sup> | 4.64x10 <sup>4</sup> | 23.98<br>(1.49)                         | 100<br>(30/30)                 | 6.21      | 24.17<br>(1.82)                       | 34.44<br>(1.52)                          | 83.33<br>(25/30)               | 4.41      | 35.69<br>(3.33)                       | 23.12<br>(0.74)                         | 100<br>(30/30)                 | 3.20      | 23.62<br>(0.90)                       |
| 10 <sup>-6</sup> | 2                                       | 1.33x10 <sup>2</sup> | 6.65x10 <sup>3</sup> | 24.01<br>(1.56)                         | 100<br>(30/30)                 | 6.50      | 24.26<br>(2.08)                       | 34.71<br>(1.63)                          | 86.66<br>(26/30)               | 4.70      | 34.19<br>(-*)                         | 23.31<br>(0.80)                         | 100<br>(30/30)                 | 3.43      | 23.47<br>(0.75)                       |
